# Supplementary material for: Distinct Effects of p19 RNA Silencing Suppressor on Small RNA Mediated Pathways in Plants
Source: PubMed Central journal article supplement (PMC5053613; doi:10.1371/journal.ppat.1005935), 2016-10-06
Supplement: ppat.1005935.s002.pdf [file ppat.1005935.s002.pdf]

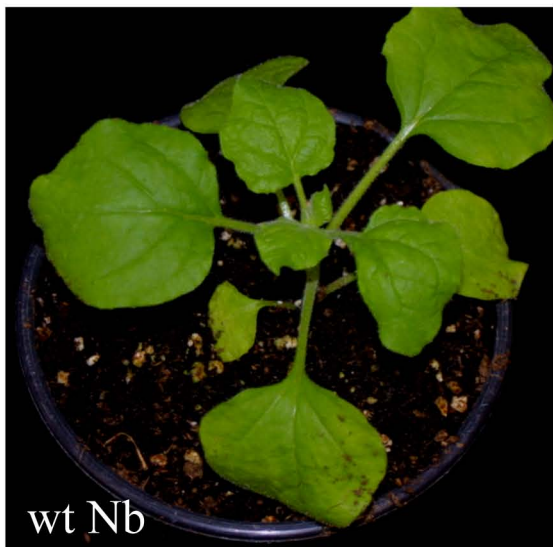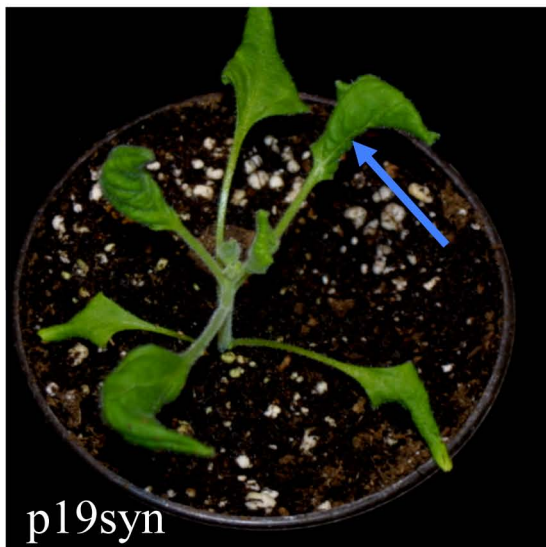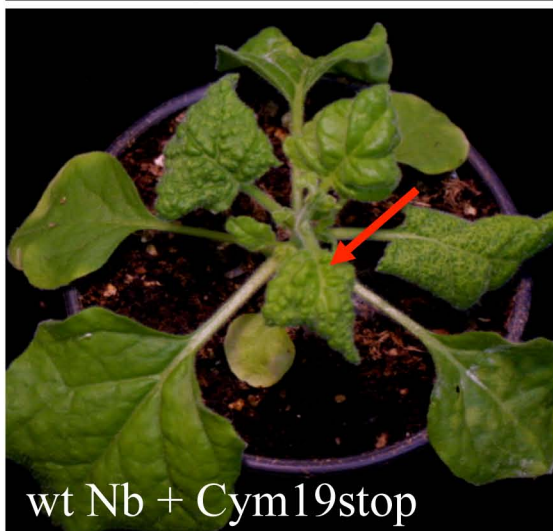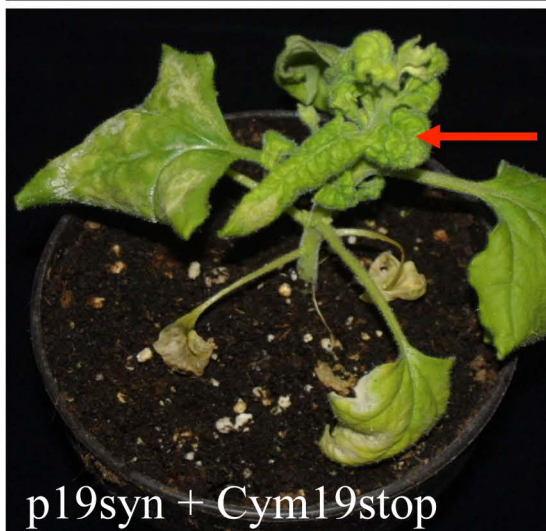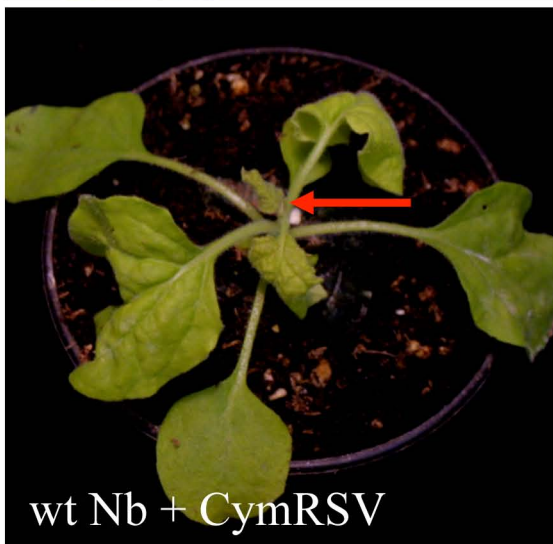

S2B

wt Nb + Cym19stop 21°C

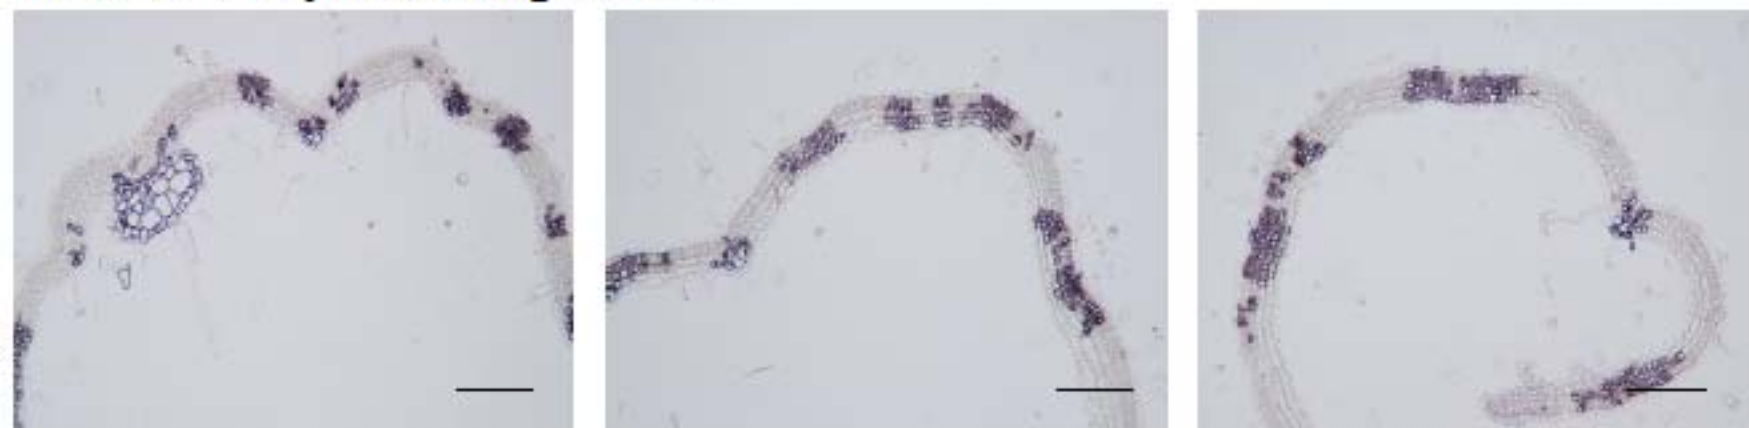

wt Nb + Mock

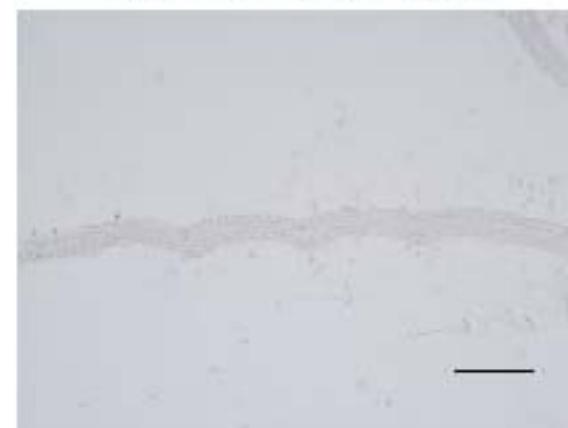

p19syn + Cym19stop 21°C

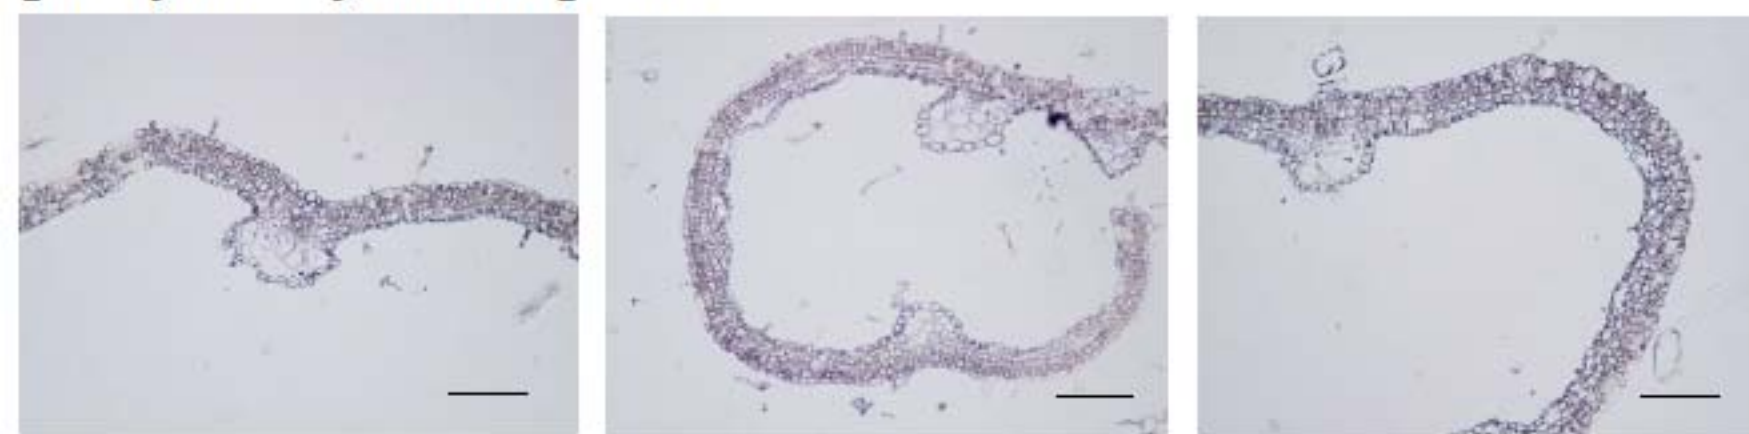

wt Nb + CymRSV 21°C

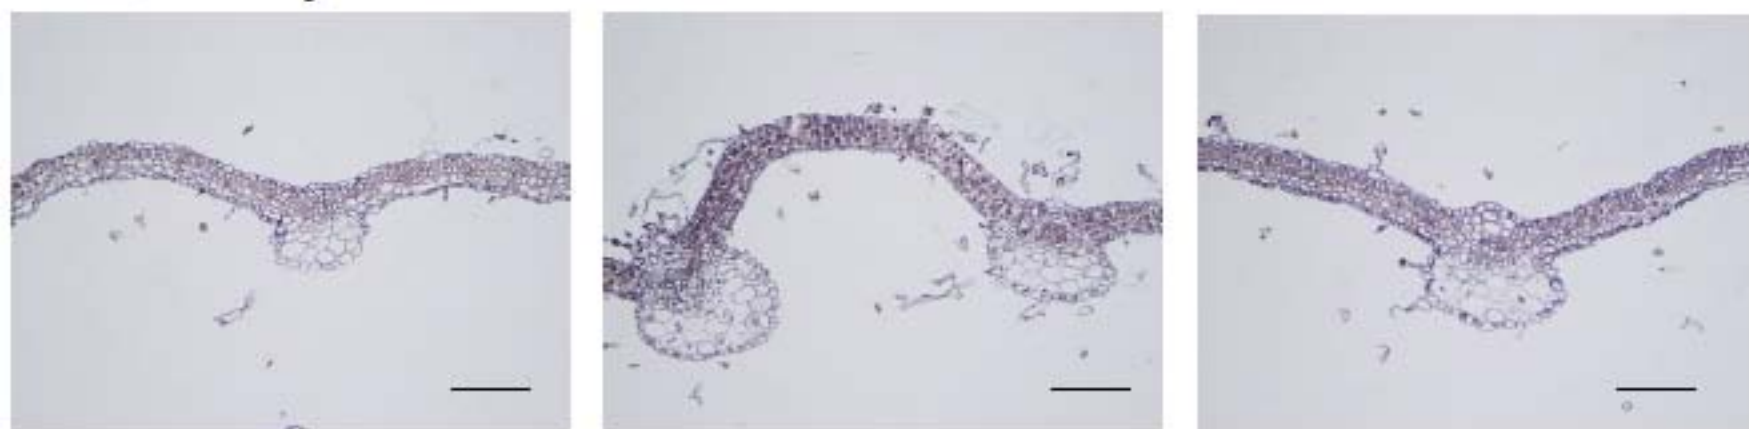

Bar= 200  $\mu$ m
