# Supplementary material for: Distinct Effects of p19 RNA Silencing Suppressor on Small RNA Mediated Pathways in Plants
Source: PubMed Central journal article supplement (PMC5053613; doi:10.1371/journal.ppat.1005935), 2016-10-06

### S3 Figure

A

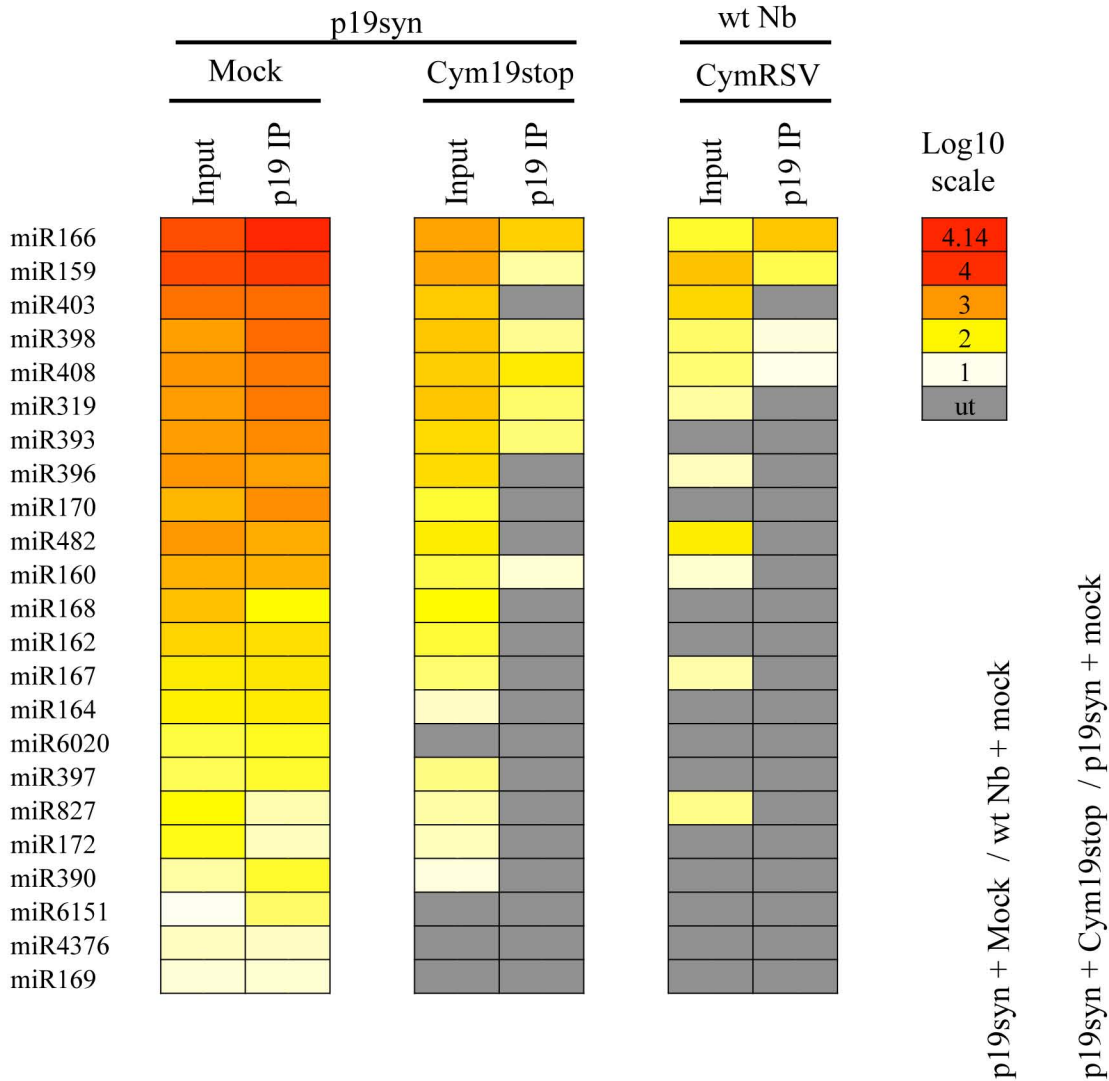

B

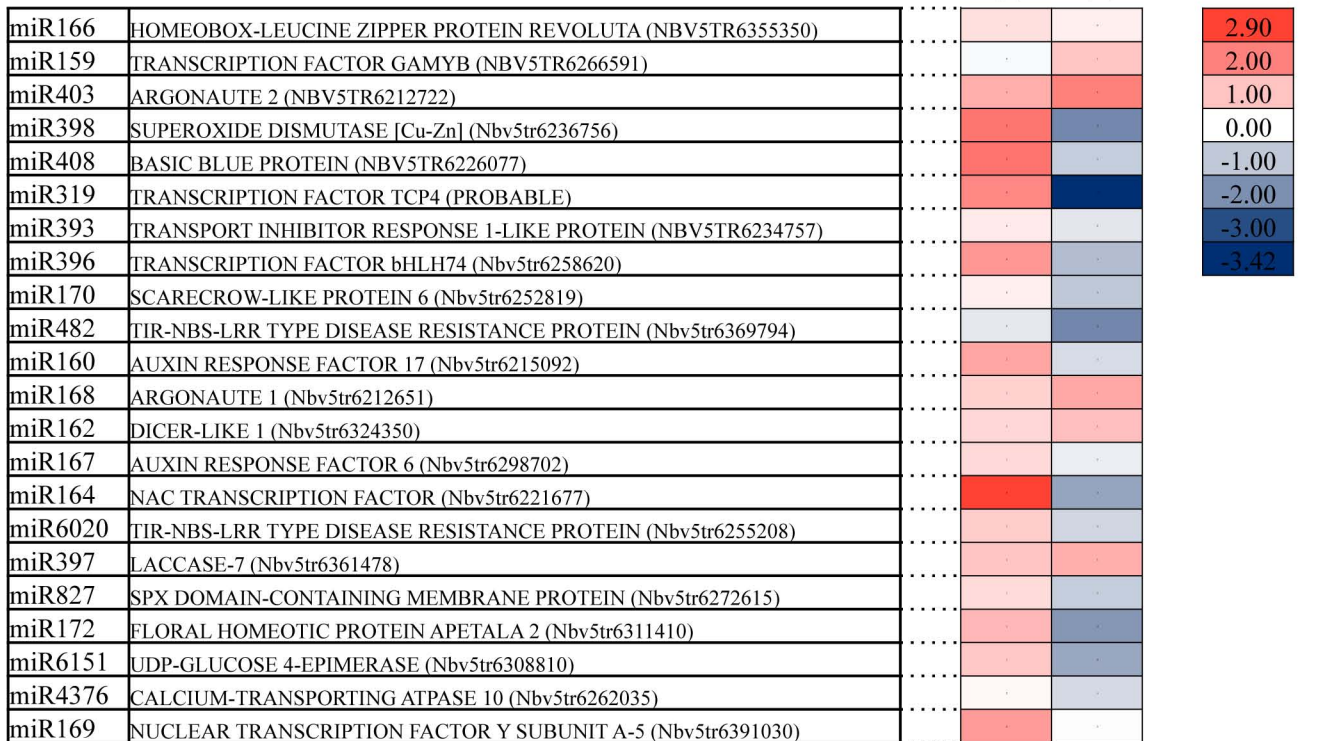

### S3C Figure

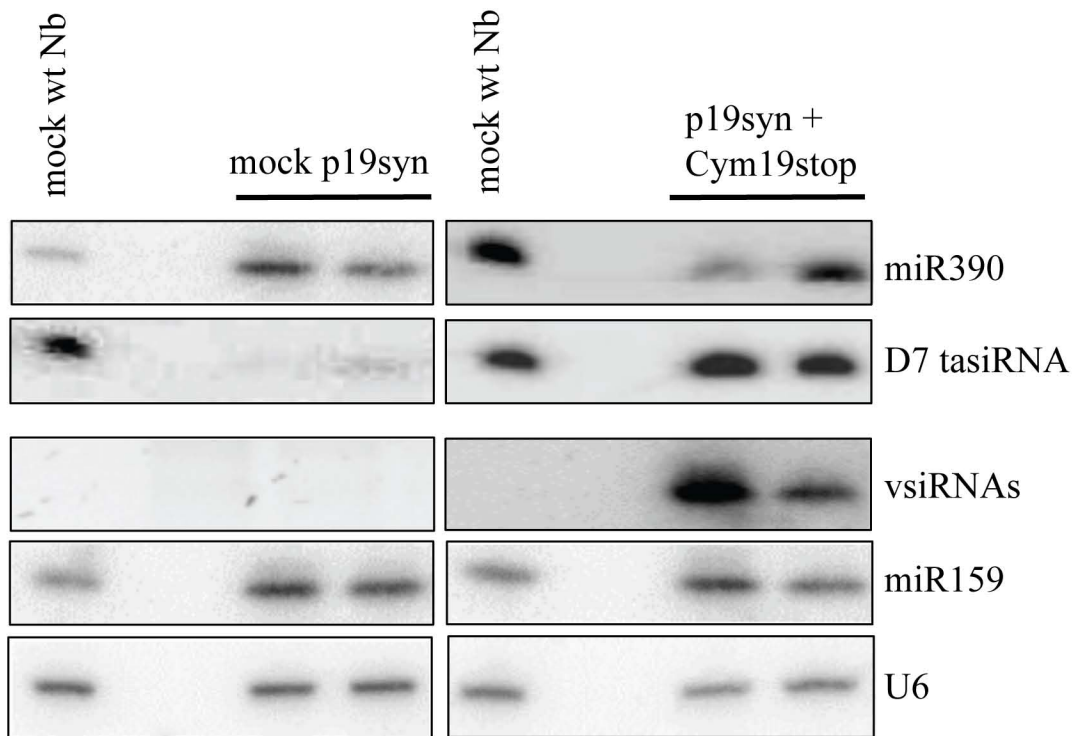

Supplement: ppat.1005935.s003.pdf [file ppat.1005935.s003.pdf]
